# Supplementary material
Source: publisher site journal article supplement (http://edge.sagepub.com/sites/default/files/Appendix_9.pdf)
Supplement: Supplementary file 1 [file Appendix_9.pdf]

# Appendix 9

## Text Structures for Times of Conflict

### Lighting a Fire Under a Procrastinator

|                                |                                                  |                                      |                                     |                                            |                                       |           |
|--------------------------------|--------------------------------------------------|--------------------------------------|-------------------------------------|--------------------------------------------|---------------------------------------|-----------|
| You don't want to —, but I do. | We both want —, and your way of getting it is... | But my observations have shown me... | What we've tried that hasn't worked | Here are our assets/strengths right now... | What is happening while we do nothing | Let's go. |
|--------------------------------|--------------------------------------------------|--------------------------------------|-------------------------------------|--------------------------------------------|---------------------------------------|-----------|

Patrick Henry

### How Bullying Works

|                                  |                           |                                 |                          |
|----------------------------------|---------------------------|---------------------------------|--------------------------|
| Where they see you (or find you) | What they demand from you | What they will do if you refuse | How people usually react |
|----------------------------------|---------------------------|---------------------------------|--------------------------|

Janet Schaw

### Narrative: Just the Facts

|                     |                    |                    |
|---------------------|--------------------|--------------------|
| What happened first | What happened next | What happened last |
|---------------------|--------------------|--------------------|

Ida B. Wells-Barnett

### We're Both Wrong; We're Both Right

|                                |                                     |                        |                    |                       |
|--------------------------------|-------------------------------------|------------------------|--------------------|-----------------------|
| Here's what has been happening | Here are both sides of the conflict | We can't both be right | We share the blame | Let's heal the damage |
|--------------------------------|-------------------------------------|------------------------|--------------------|-----------------------|

Abraham Lincoln

### Breaking into a Heated Argument

|                           |                                            |                                                 |                               |                                           |
|---------------------------|--------------------------------------------|-------------------------------------------------|-------------------------------|-------------------------------------------|
| The sides of the argument | You say this, but it's not true because... | You also say this, but it's not true because... | And you also say this, but... | So this is what will make things right... |
|---------------------------|--------------------------------------------|-------------------------------------------------|-------------------------------|-------------------------------------------|

Sojourner Truth
